- 17 Takimoto R, Kato J, Terui T, Takada K, Kuroiwa G, et al: Augmentation of antitumor effects of p53 gene therapy by combination with HDAC inhibitor. *Cancer Biol Ther* 2005;4:421–428.
- 18 Cangul H: Hypoxia upregulates the expression of the NDRG1 gene leading to its over-expression in various human cancers. *BMC Genet* 2004;5:27–38.
- 19 Segawa T, Nau ME, Xu LL, Chilukuri RN, Makarem M, et al: Androgen-induced expression of endoplasmic reticulum stress response genes in prostate cancer cells. *Oncogene* 2002;21:8749–8758.
- 20 Tu LC, Yan X, Hood L, Lin B: Proteomics analysis of the interactome of N-myc downstream regulated gene 1 and its interactions with the androgen response program in prostate cancer cells. *Mol Cell Proteomics* 2007;6:575–588.
- 21 Goto Y, Hayashi R, Muramatsu T, Ogawa H, Eguchi I, et al: JPO1/CDCA7, a novel transcription factor E2F1-induced protein, possesses intrinsic transcriptional regulator activity. *Biochim Biophys Acta* 2006;1759:60–68.
- 22 Liu SJ, Zhang ZH, Zhang DQ, Sui XM, Liu YJ, et al: Gene profiling after knocking-down expression of nucleostemin in HeLa cells using oligonucleotide DNA microarray. *J Exp Clin Cancer Res* 2006;25:575–583.
- 23 Meng L, Lin T, Tsai RY: Nucleoplasmic mobilization of nucleostemin stabilizes MDM2 and promotes G2-M progression and cell survival. *J Cell Sci* 2008;121:4037–4046.
- 24 Dai MS, Sun XX, Lu H: Aberrant expression of nucleostemin activates p53 and induces cell cycle arrest via inhibition of MDM2. *Mol Cell Biol* 2008;28:4365–4376.

## Erratum

Please amend the following in the article by Zhu et al: Association between vitamin D receptor gene polymorphisms and idiopathic hypocitraturia in the Chinese population. *Urol Int* 2010;85:100–105.

The authors' affiliations should read as follows:

Chenxi Zhu<sup>a, b</sup> Zhangqun Ye<sup>a</sup> Zhiqiang Chen<sup>a</sup> Ding Xia<sup>a</sup> Jia Hu<sup>a</sup>

Departments of Urology, <sup>a</sup>Tongji Hospital and <sup>b</sup>Central Hospital of Wuhan, Tongji Medical College, Huazhong University of Science and Technology, Wuhan, China

Also, in table 1, p. 103, the data for *FokI* should now read:

|                          |                 |                 |              |
|--------------------------|-----------------|-----------------|--------------|
| <i>FokI</i> <sup>b</sup> |                 |                 |              |
| FF                       | 13 (14.05)      | 6 (3.56)        | $z = -2.323$ |
| Ff                       | 27 (24.91)      | 9 (13.89)       | $p = 0.020$  |
| ff                       | 10 (11.05)      | 16 (13.56)      |              |
| HWE                      | $\chi^2 = 0.35$ | $\chi^2 = 3.84$ |              |
|                          | $p = 0.5530$    | $p = 0.0501$    |              |
